# Supplementary material for: Conversion of sewage sludge into high-performance bifunctional electrode materials for microbial energy harvesting
Source: Royal Society of Chemistry journal article supplement (doi:10.1039/c5ta00458f), 2015-01-01
Supplement: c5ta00458f1.pdf [file c5ta00458f1.pdf]

## Supporting Informations

### **Conversion of sewage sludge into high-performance bifunctional electrode materials for microbial energy harvesting†**

Yong Yuan,<sup>a</sup> Ting Liu,<sup>a,b</sup> Peng Fu,<sup>a,c</sup> Jiahuan Tang,<sup>a</sup> and Shungui Zhou<sup>\*a</sup>

<sup>a</sup> Guangdong Key Laboratory of Agricultural Environment Pollution Integrated Control, Guangdong Institute of Eco-Environmental and Soil Sciences, Guangzhou 510650, China

<sup>b</sup> Orient Science & Technology College, Hunan Agricultural University, Changsha 410128, China

<sup>c</sup> School of Chemical Engineering and Light Industry, Guangdong University of Technology, Guangzhou 510006, China

\*Corresponding Author:

Phone: 86-20-3730-0951; Fax: +86-20-8702-5872;

email: [sgzhou@soil.gd.cn](mailto:sgzhou@soil.gd.cn)

**Table S1****Table S1. Element contents and electrochemical performance of electrodes**

| Anodes | C%   | O%   | N%   | Fe% | P%   | BET<br>(m <sup>2</sup> /g) | Biomass<br>(μg protein cm <sup>-2</sup> ) | EIS (Ω)        |                 | Power density<br>(mW m <sup>-2</sup> ) |
|--------|------|------|------|-----|------|----------------------------|-------------------------------------------|----------------|-----------------|----------------------------------------|
|        |      |      |      |     |      |                            |                                           | R <sub>s</sub> | R <sub>ct</sub> |                                        |
| SM-0   | 9.4  | 48.1 | 1.27 | 4.8 | 5.43 | 16 ± 3                     | 871 ± 25                                  | 36 ± 4         | 27 ± 3          | 486 ± 18                               |
| SM-5   | 37.5 | 36.8 | 1.16 | 3.4 | 3.15 | 24 ± 5                     | 911 ± 30                                  | 27 ± 2         | 9 ± 2           | 787 ± 17                               |
| SM-10  | 46.1 | 32.5 | 1.09 | 2.7 | 2.55 | 36 ± 2                     | 1191 ± 20                                 | 23 ± 2         | 4 ± 1.5         | 1069 ± 15                              |
| SM-20  | 59.2 | 26.9 | 0.92 | 2.2 | 1.63 | 54 ± 5                     | 1131 ± 24                                 | 20 ± 2         | 2 ± 1           | 927 ± 16                               |
| GP     | 96.2 | 2.8  | /    | /   | /    | 5 ± 1                      | 881 ± 18                                  | 20 ± 2         | 39 ± 4          | 410 ± 10                               |
| CP     | 82.9 | 11.1 | 0.59 | /   | 0.28 | 92 ± 8                     | 956 ± 16                                  | 21 ± 1         | 12 ± 2          | 788 ± 39                               |

/ undetectable; the power densities were achieved from the MFCs with the Pt/C cathodes; Error bars represent ± SD (n= 3)

**Figure S1**

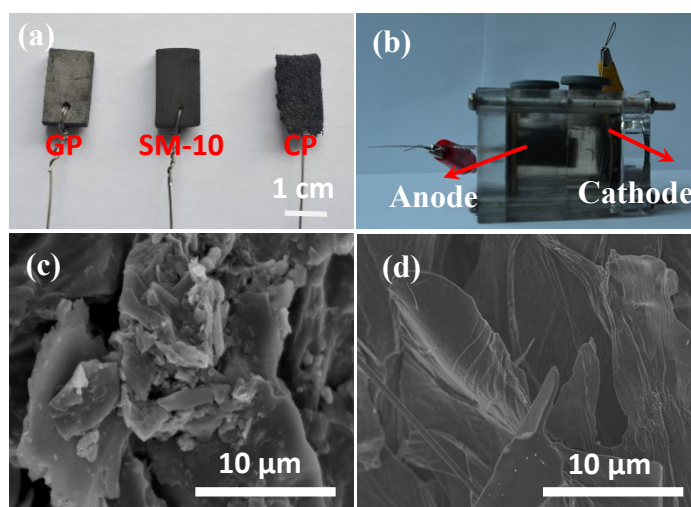

**Figure S1.** (a) Photographic illumination of the as-prepared anodes; (b) photographic image of the MFC equipped with the as-prepared anodes; (c) SEM image of the graphite plate (GP) anode; (d) SEM image of the coconut shell-derived carbon plate (CP) anode.

**Figure S2**

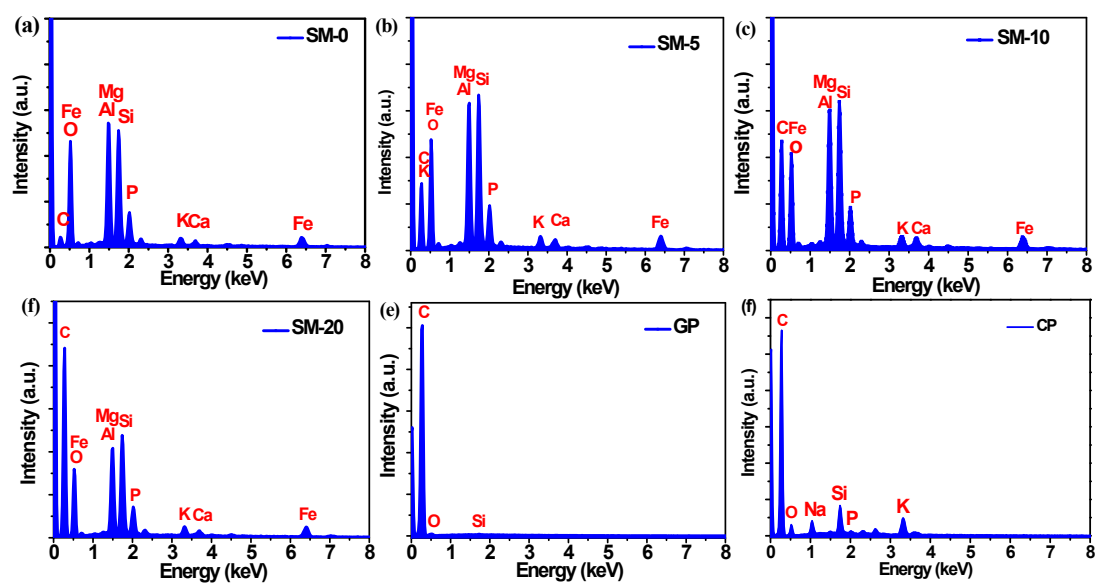

**Figure S2.** EDX spectrum showing the elemental composition of the resultant anodes.

**Figure S3**

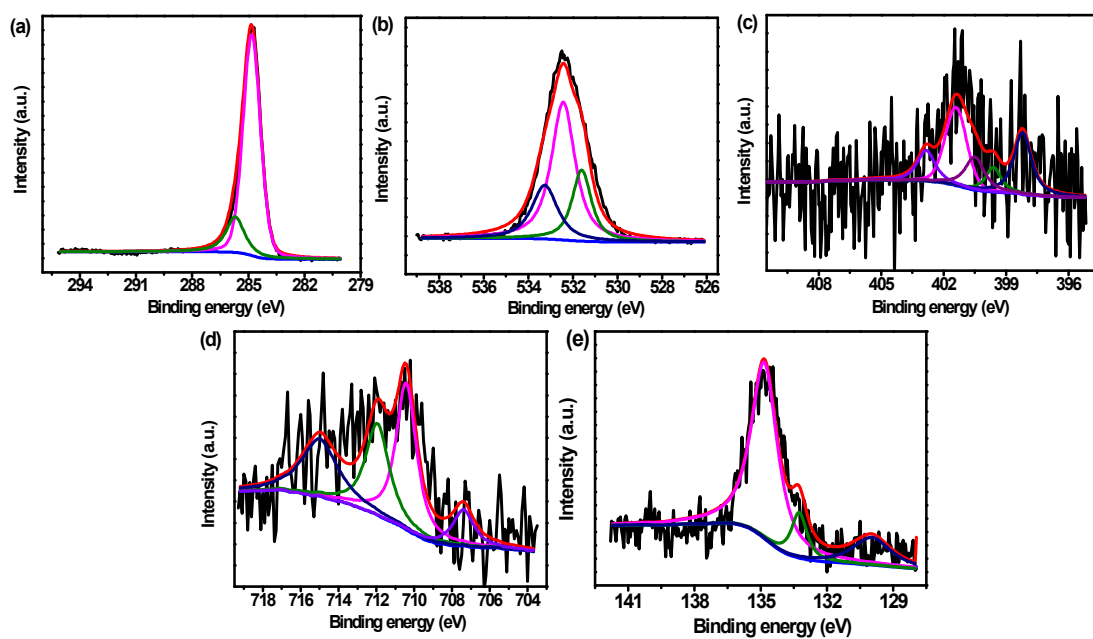

**Figure S3.** C1s (a), O1s (b), N1s (c), Fe2p (d) and P2p (e) core-level XPS spectra of SM-10.

**Figure S4**

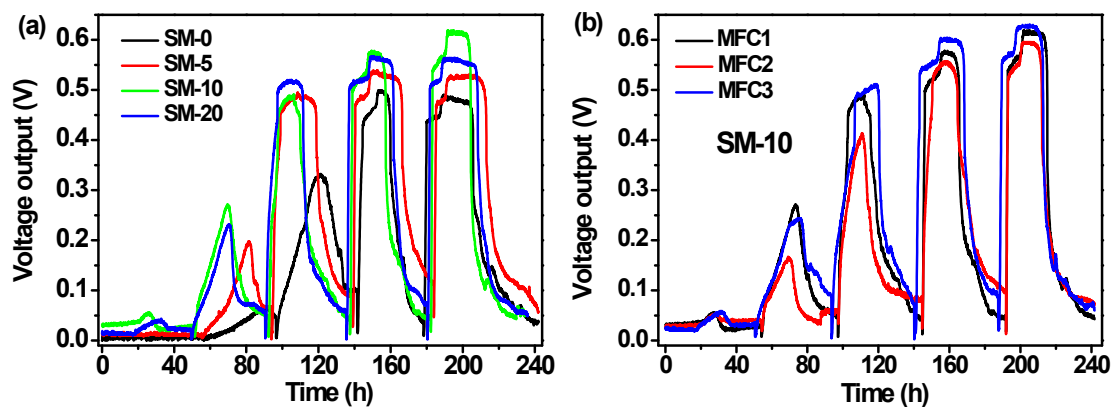

**Figure S4.** (a) Voltage output versus time curves during start-up of the MFCs with various anodes with a 1 k $\Omega$  resistance loading; (b) Voltage output versus time curves of three parallel MFCs with the SM-10 anode.

**Figure S5**

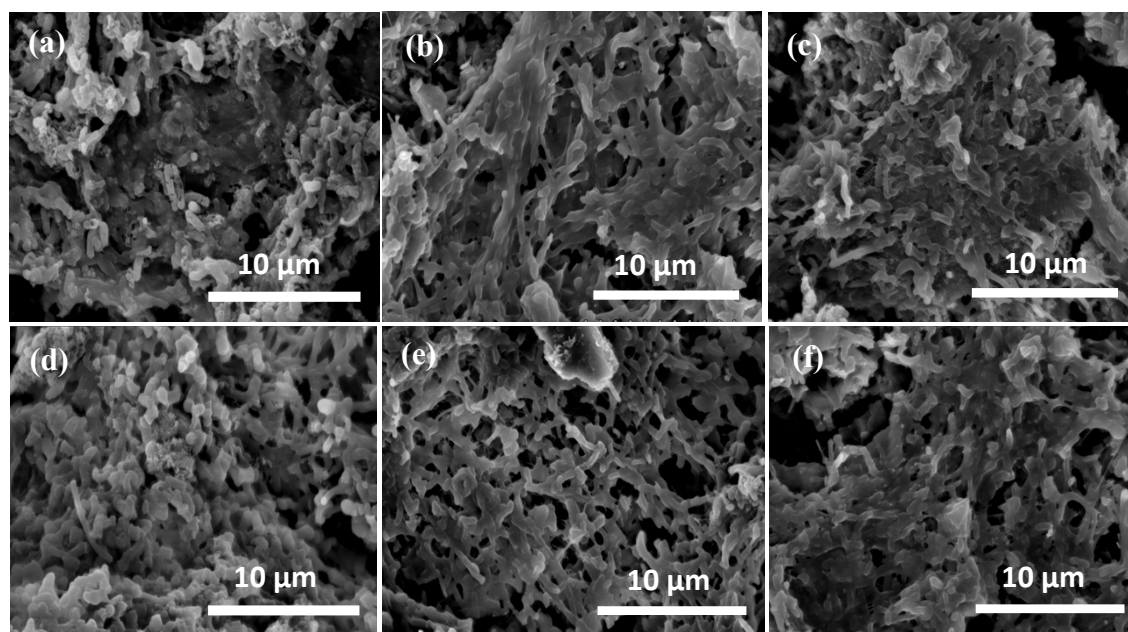

**Figure S5.** SEM images of the electroactive biofilm grown on the (a) SM-0, (b) SM-5, (c) SM-10, (d) SM-20, (e) GP and (f) CP andoes.

**Figure S6**

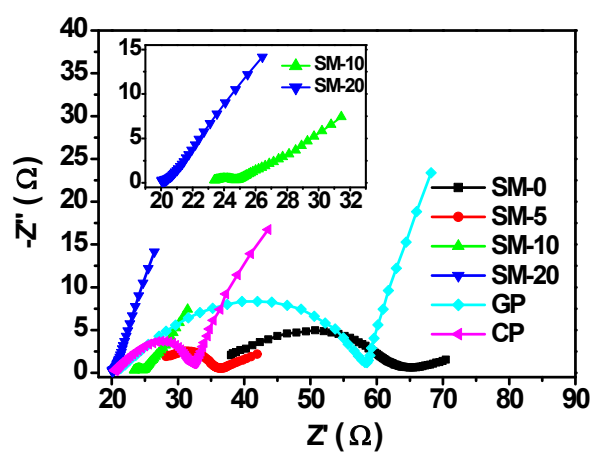

**Figure S6. (a)** Nyquist plots of the different anodes in the MFCs after inoculation. The inset contains Nyquist plots of the SM-10 and SM-20 anodes.

**Figure S7**

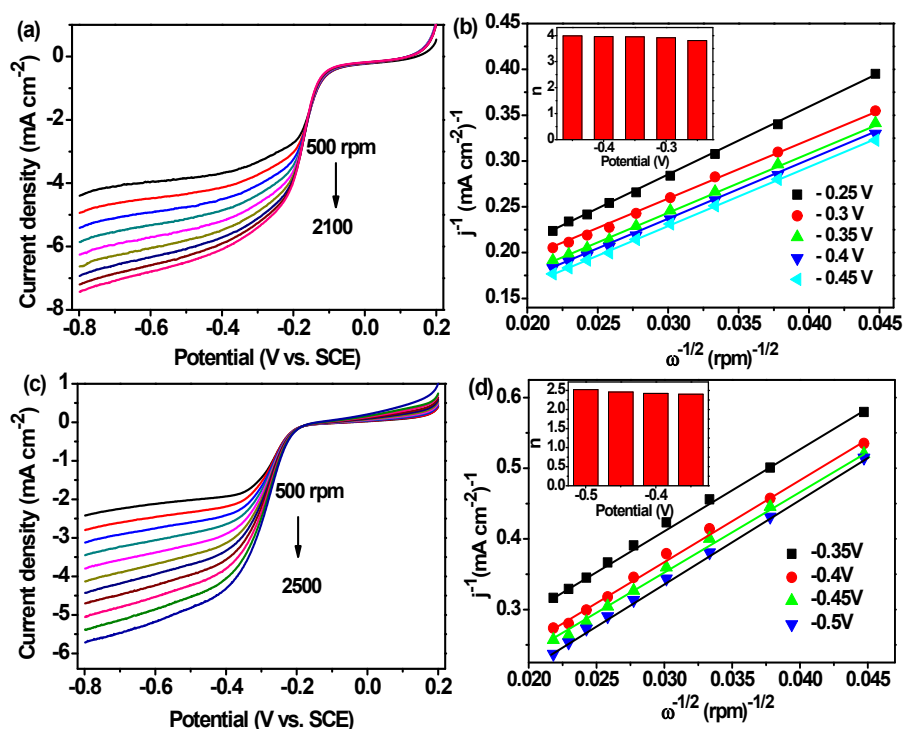

**Figure S7.** (a) RDE voltammograms of the Pt/C in O<sub>2</sub>-saturated 0.1 M KOH collected with a sweep rate of 10 mV/s at various rotation speeds; (d) corresponding Koutecky-Levich plots ( $j^{-1}$  vs.  $\omega^{-0.5}$ ) at different potentials on the Pt/C electrode (Inset: the estimated electron-transfer numbers at various potentials); (c) RDE voltammograms of the PSM-0 in O<sub>2</sub>-saturated 0.1 M KOH collected with a sweep rate of 10 mV/s at various rotation speeds; (d) corresponding Koutecky-Levich plots ( $j^{-1}$  vs.  $\omega^{-0.5}$ ) at different potentials on the PSM-0 electrode (Inset: the estimated electron-transfer numbers at various potentials)

In the Koutecky-Levich (K-L) plots of the catalysts, the relationship between  $1/j$  and  $\omega^{-1/2}$  was linear in the related potential regions. The K-L equations (eqs. 1 and 2) were used to further explore the reaction performance:

$$1/j = 1/j_k + 1/B\omega^{1/2} \quad (1)$$

$$B = 0.2nFC(D)^{2/3}v^{-1/6} \quad (2)$$

where  $j$  is the measured current density,  $j_k$  is the kinetic limiting current density,  $B$  is the Levich slope,  $\omega$  is the rotation speed,  $n$  is the total number of electrons transferred during ORR,  $F$  is the Faraday constant,  $C$  is the bulk O<sub>2</sub> concentration in the electrolyte,  $D$  is the O<sub>2</sub> diffusion coefficient, and  $v$  is the kinematic viscosity of the electrolyte. The number of electrons transferred during the ORR process was determined using Eqs. (1) and (2).

**Figure S8**

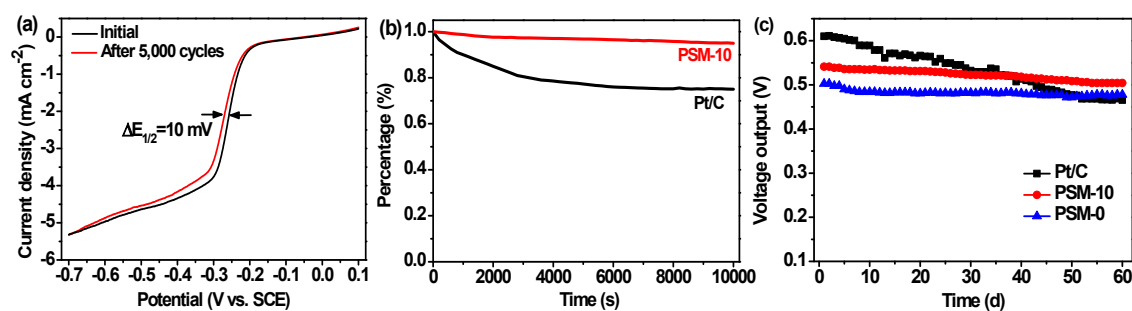

**Figure S8.** (a) RDE polarization curve of PMS-10 with scan rate of 10 mV/s before and after 5000 scanning cycles in O<sub>2</sub>-saturated 0.1 M KOH; (b) Chronoamperometric responses (percentage of current retained versus operation time) of the kept at -0.40 V versus SCE in O<sub>2</sub>-saturated 0.1 M KOH electrolyte at a rotating rate of 1100 rpm; (c) long-term stability tests of the MFCs with the SM-10 anodes and different cathodes (the voltage outputs were examined at 1000  $\Omega$ ).
